# Supplementary material for: Reactivation of wild-type and mutant p53 by tryptophanolderived oxazoloisoindolinone SLMP53-1, a novel anticancer small-molecule
Source: PubMed Central journal article supplement (PMC4826208; doi:10.18632/oncotarget.6775), 2015-12-28
Supplement: oncotarget-07-4326-s001.pdf [file oncotarget-07-4326-s001.pdf]

## Reactivation of wild-type and mutant p53 by tryptophanol-derived oxazoloisoindolinone SLMP53-1, a novel anticancer small-molecule

### Supplementary Materials

**Supplementary Table S1: Safety profile for the three mice groups under study at the final time point**

|                                                          | Saline          | Vehicle        | Treated         |
|----------------------------------------------------------|-----------------|----------------|-----------------|
| <i>Body weight and relative tissue weight (trophism)</i> |                 |                |                 |
| BW (g)                                                   | 340.30 ± 13.45  | 361.80 ± 0.01  | 348.30 ± 0.01   |
| Heart/BW (g/kg)                                          | 3.03 ± 0.03     | 3.01 ± 0.09    | 2.91 ± 0.07     |
| Liver/BW (g/kg)                                          | 38.71 ± 2.36    | 38.52 ± 0.89   | 35.74 ± 0.81    |
| Kidney/BW (g/kg)                                         | 7.08 ± 0.40     | 6.81 ± 0.27    | 6.55 ± 0.34     |
| Lung/BW (g/kg)                                           | 3.89 ± 0.07     | 3.81 ± 0.08    | 3.83 ± 0.11     |
| <i>Biochemical data</i>                                  |                 |                |                 |
| Blood Glucose (mg/dL)                                    | 188.0 ± 7.51    | 207.20 ± 7.00  | 186.80 ± 11.12  |
| Urea (mg/dL)                                             | 20.67 ± 0.77    | 18.34 ± 0.24*  | 18.48 ± 1.31    |
| Uric acid (mg/dL)                                        | 1.07 ± 0.07     | 0.82 ± 0.10    | 0.78 ± 0.05*    |
| Creatinine (mg/dL)                                       | 0.30 ± 0.00     | 0.30 ± 0.01    | 0.30 ± 0.01     |
| Total Proteins (g/dL)                                    | 5.50 ± 0.00     | 5.35 ± 0.17    | 5.08 ± 0.15     |
| Albumin (g/dL)                                           | 3.03 ± 0.03     | 2.90 ± 0.05    | 2.73 ± 0.09*    |
| ALT (U/L)                                                | 36.00 ± 2.89    | 30.75 ± 3.30   | 32.50 ± 4.87    |
| AST (U/L)                                                | 95.33 ± 25.36   | 56.25 ± 4.60   | 67.00 ± 11.05   |
| CK (U/L)                                                 | 458.30 ± 148.60 | 229.50 ± 64.40 | 281.80 ± 101.90 |
| Total Chol (mg/dL)                                       | 44.33 ± 1.76    | 52.40 ± 3.54   | 60.25 ± 5.98    |
| Triglycerides (mg/dL)                                    | 107.00 ± 16.29  | 161.40 ± 17.55 | 169.80 ± 24.00  |
| <i>Hematological data</i>                                |                 |                |                 |
| RBC count (x10 <sup>6</sup> /μL)                         | 7.10 ± 0.15     | 7.41 ± 0.28    | 7.28 ± 0.27     |
| HGB (g/dL)                                               | 13.97 ± 0.18    | 13.95 ± 0.46   | 13.53 ± 0.25    |
| HCT (%)                                                  | 40.50 ± 0.82    | 42.28 ± 2.03   | 39.63 ± 0.99    |
| WBC counts (x10 <sup>3</sup> /μL)                        | 5.23 ± 0.52     | 5.95 ± 1.61    | 5.08 ± 0.434    |
| PLT counts (x10 <sup>3</sup> /μL)                        | 811.00 ± 29.61  | 793.80 ± 28.35 | 852.50 ± 32.05  |
| PCT (%)                                                  | 0.47 ± 0.03     | 0.46 ± 0.009   | 0.50 ± 0.02     |
| RET counts (%)                                           | 2.80 ± 0.12     | 3.56 ± 0.23*   | 3.28 ± 0.23     |

The results are expressed as mean ± SEM ( $n = 4-6$ ). \* $p < 0.05$  versus Control group; ALT, alanine aminotransferase; AST, aspartate aminotransferase; BW, body weight; CK, Creatine Kinase; HCT, hematocrit; HGB, Hemoglobin concentration; PCT, plateletcrit; PLT, platelet; RBC, red blood cell count; RET, reticulocytes; WBC, white blood cell.

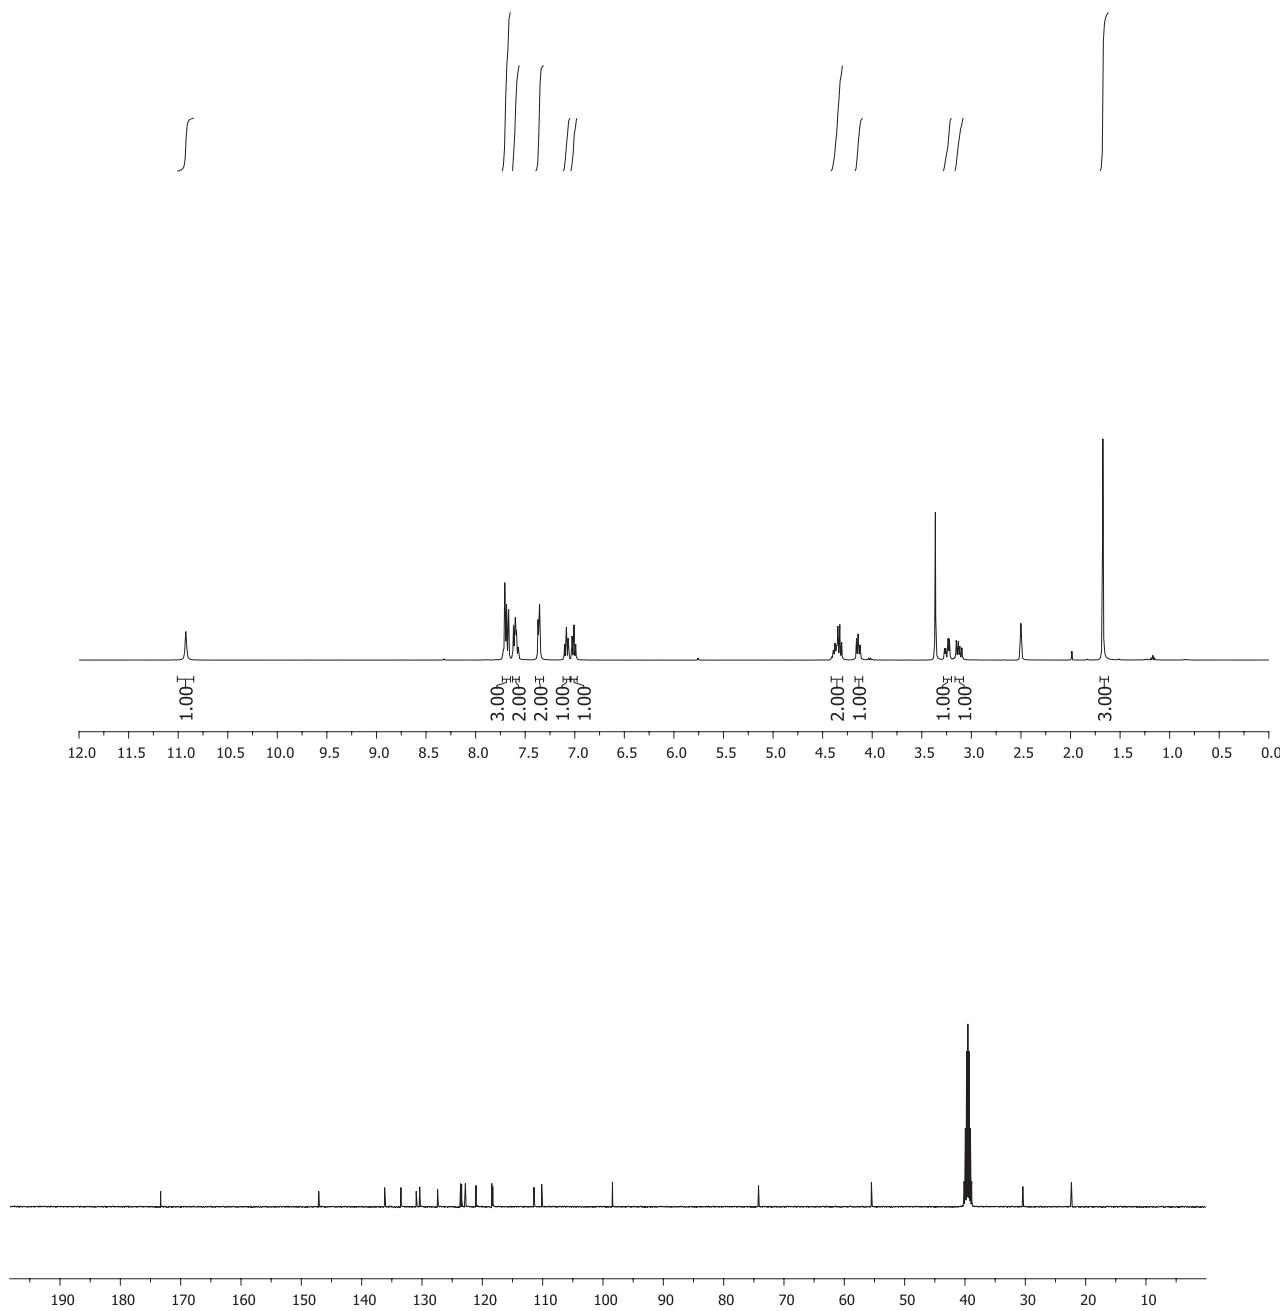

**Supplementary Figure S1: <sup>1</sup>H NMR and <sup>13</sup>C NMR data for compound SLMP53-1.**
